# Supplementary material for: Pyrethroid Resistance Aggravation in Ugandan Malaria Vectors Is Reducing Bednet Efficacy
Source: MDPI journal article supplement (doi:10.3390/pathogens10040415), 2021-04-01
Supplement: s1 [file s1]

**Table 1.** Type of houses in the collection sites.

| Site         | Type of house                      |                              |                                          |                |           |
|--------------|------------------------------------|------------------------------|------------------------------------------|----------------|-----------|
|              | Circular hut with<br>thatched roof | Rectangular thatched<br>roof | Rectangular with<br>corrugated iron roof | Total          |           |
| Busia        | 6 (24%)                            | 6 (24%)                      | 13 (52%)                                 | 25 (100%)      |           |
| Mayuge       | 4 (11.4%)                          | 17 (48.6%)                   | 14 (40%)                                 | 35 (100%)      |           |
| Wall surface |                                    |                              |                                          |                |           |
|              | Brick                              | Cement                       | Mud                                      | Painted Cement | Total     |
| Busia        | 0 (0%)                             | 3 (12%)                      | 22 (88%)                                 | 0 (0%)         | 25 (100%) |
| Mayuge       | 8 (22.9%)                          | 0 (0%)                       | 26 (74.3%)                               | 1 (2.8%)       | 35 (100%) |

**Table 2.** Number of mosquitoes collected and the oviposition rate per site.

| Collection sites | Total collected      | Forced to lay       |                    |                     | Oviposition        |
|------------------|----------------------|---------------------|--------------------|---------------------|--------------------|
|                  | <i>Anopheles spp</i> | <i>An. funestus</i> | <i>An. gambiae</i> | <i>An. funestus</i> | <i>An. gambiae</i> |
| Busia            | ~ 900                | 586                 | 163                | 342 (58%)           | 58 (35%)           |
| Mayuge           | ~ 1200               | 1050                | 78                 | 662 (63%)           | 26 (33%)           |
| <b>Total</b>     | <b>2100</b>          | <b>1636</b>         | <b>241</b>         | <b>1004 (61%)</b>   | <b>84 (34%)</b>    |
